# Supplementary material for: Dual TLR9 and PD-L1 targeting unleashes dendritic cells to induce durable antitumor immunity
Source: PubMed Central journal article supplement — J Immunother Cancer. 2023 May 19;11(5):e006714. doi: 10.1136/jitc-2023-006714 (PMC10201251; doi:10.1136/jitc-2023-006714), 2023-05-19
Supplement: jitc-2023-006714supp001.pdf [file jitc-2023-006714supp001.pdf]

### Dual TLR9 and PD-L1 targeting unleashes dendritic cells to induce durable antitumor immunity

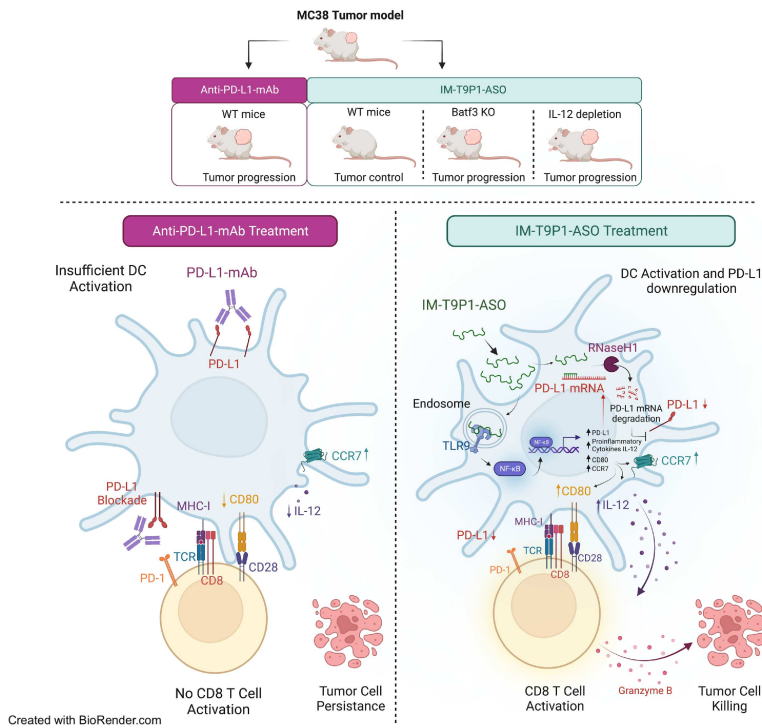

#### Authors

Laura Fernandez-Rodriguez<sup>†</sup>, Chiara Cianciaruso<sup>†</sup>, Ruben Bill, Marcel P Trefny, Richard Klar, Nicole Kirchhammer, Melanie Buchi, Julia Festag, Sven Michel, Rainer H Kohler, Elham Jones, Andre Maaske, Abhishek S Kashyap, Frank Jaschinski, Karen O Dixon, Mikael J Pittet<sup>‡</sup>, and Alfred Zippelius<sup>‡</sup>

<sup>†</sup>These authors contributed equally to this work

<sup>‡</sup>These authors contributed equally to this work

#### Correspondence

[Alfred.Zippelius@usb.ch](mailto:Alfred.Zippelius@usb.ch)

[Mikael.Pittet@unige.ch](mailto:Mikael.Pittet@unige.ch)

#### In Brief

This study reports a PD-L1-targeting antisense oligonucleotide with TLR9 agonistic capacity that stimulates intratumoral DC3s while modulating their PD-L1 expression, thereby inducing long-lasting tumor control in multiple mouse tumor models. It also shows important mechanisms in DC activation to overcome resistance to PD-L1 monoclonal antibodies, providing a roadmap for the application of these findings to the treatment of human cancer.
