# Supplementary material for: Dual TLR9 and PD-L1 targeting unleashes dendritic cells to induce durable antitumor immunity
Source: PubMed Central journal article supplement — J Immunother Cancer. 2023 May 19;11(5):e006714. doi: 10.1136/jitc-2023-006714 (PMC10201251; doi:10.1136/jitc-2023-006714), 2023-05-19

## Supplemental Figure 2

A

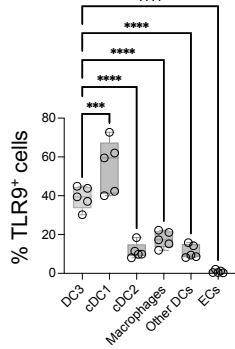Net TLR9 MFI  
(FMO MFI subtracted)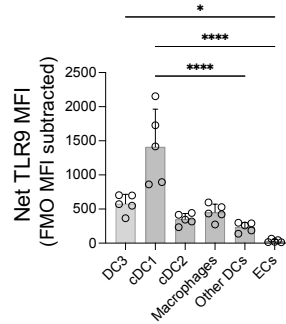

B

TLR Screening

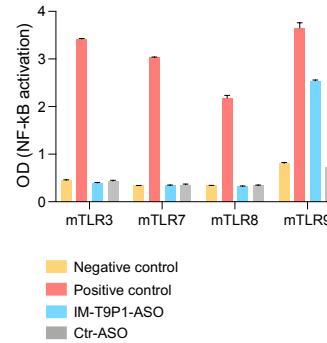

C

MC38 cells + IFN- $\gamma$  (day 6)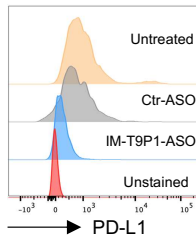

% PD-L1 (of live cells)

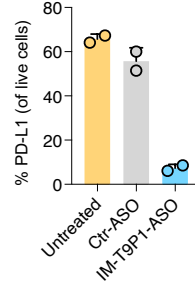

D

EMT6 cells + IFN- $\gamma$  (day 6)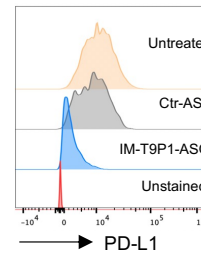PD-L1 MFI  
(of Live cells)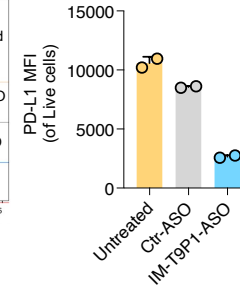

Supplement: jitc-2023-006714supp003.pdf [file jitc-2023-006714supp003.pdf]
