# Supplementary material for: Dual TLR9 and PD-L1 targeting unleashes dendritic cells to induce durable antitumor immunity
Source: HighWire-hosted journal article supplement (doi:10.1136/jitc-2023-006714), 2023-05-01

## Supplemental Figure 2

A

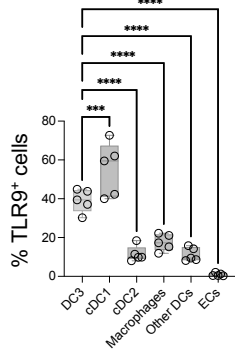Net TLR9 MFI  
(FMO MFI subtracted)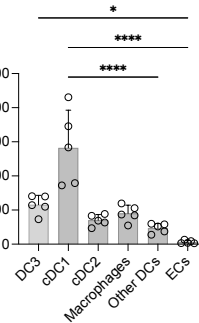

B

TLR Screening

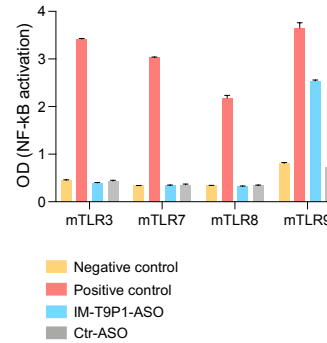

C

MC38 cells + IFN- $\gamma$  (day 6)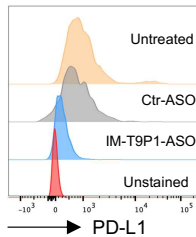

% PD-L1 (of live cells)

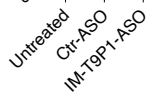

D

EMT6 cells + IFN- $\gamma$  (day 6)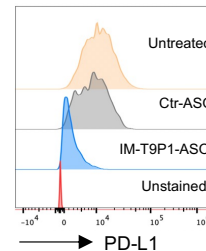PD-L1 MFI  
(of Live cells)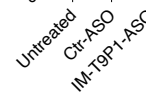

Supplement: jitc-2023-006714supp003_data_supplement.pdf [file jitc-2023-006714supp003_data_supplement.pdf]
