# Supplementary figures and images for: Dual TLR9 and PD-L1 targeting unleashes dendritic cells to induce durable antitumor immunity
Source: PubMed Central journal article supplement — J Immunother Cancer. 2023 May 19;11(5):e006714. doi: 10.1136/jitc-2023-006714 (PMC10201251; doi:10.1136/jitc-2023-006714), 2023-05-19

## Supplemental Figure 1

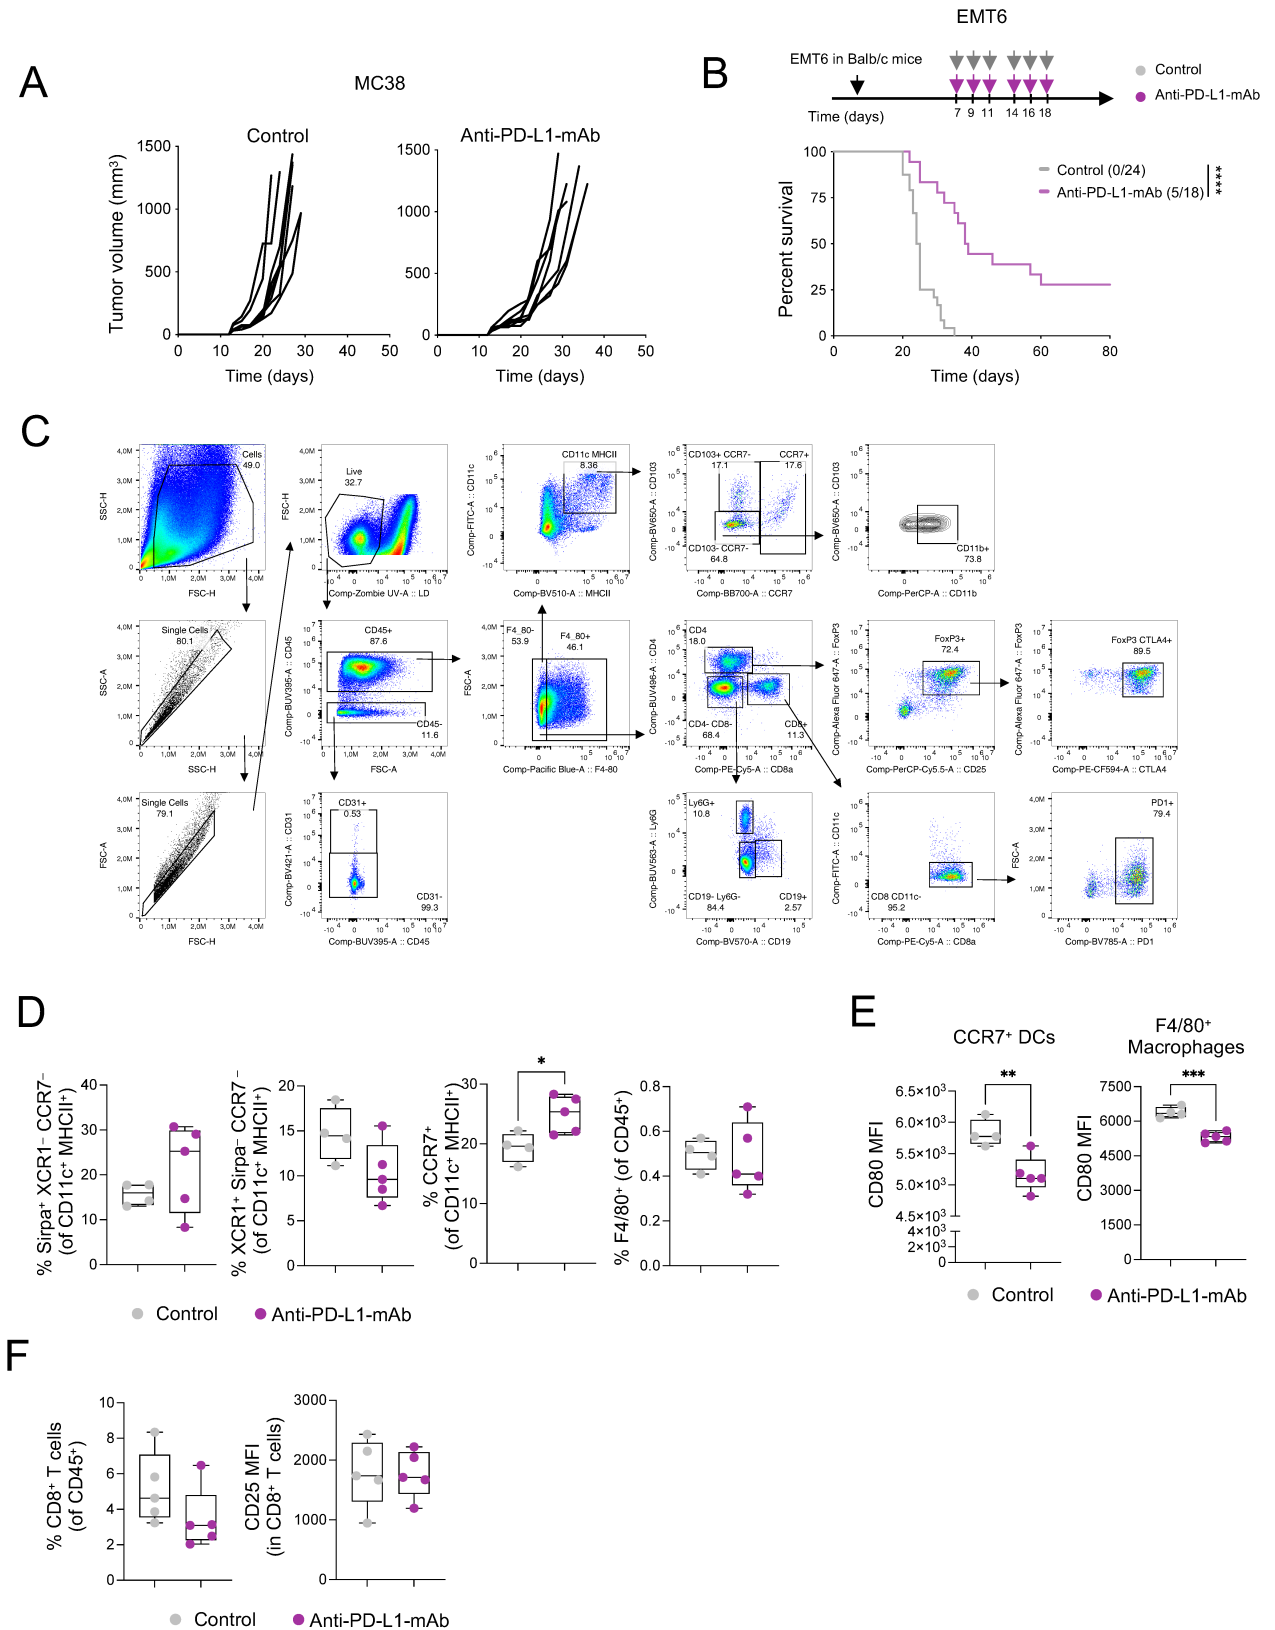

Supplement: jitc-2023-006714supp002.pdf [file jitc-2023-006714supp002.pdf]

Supplemental Figure 3

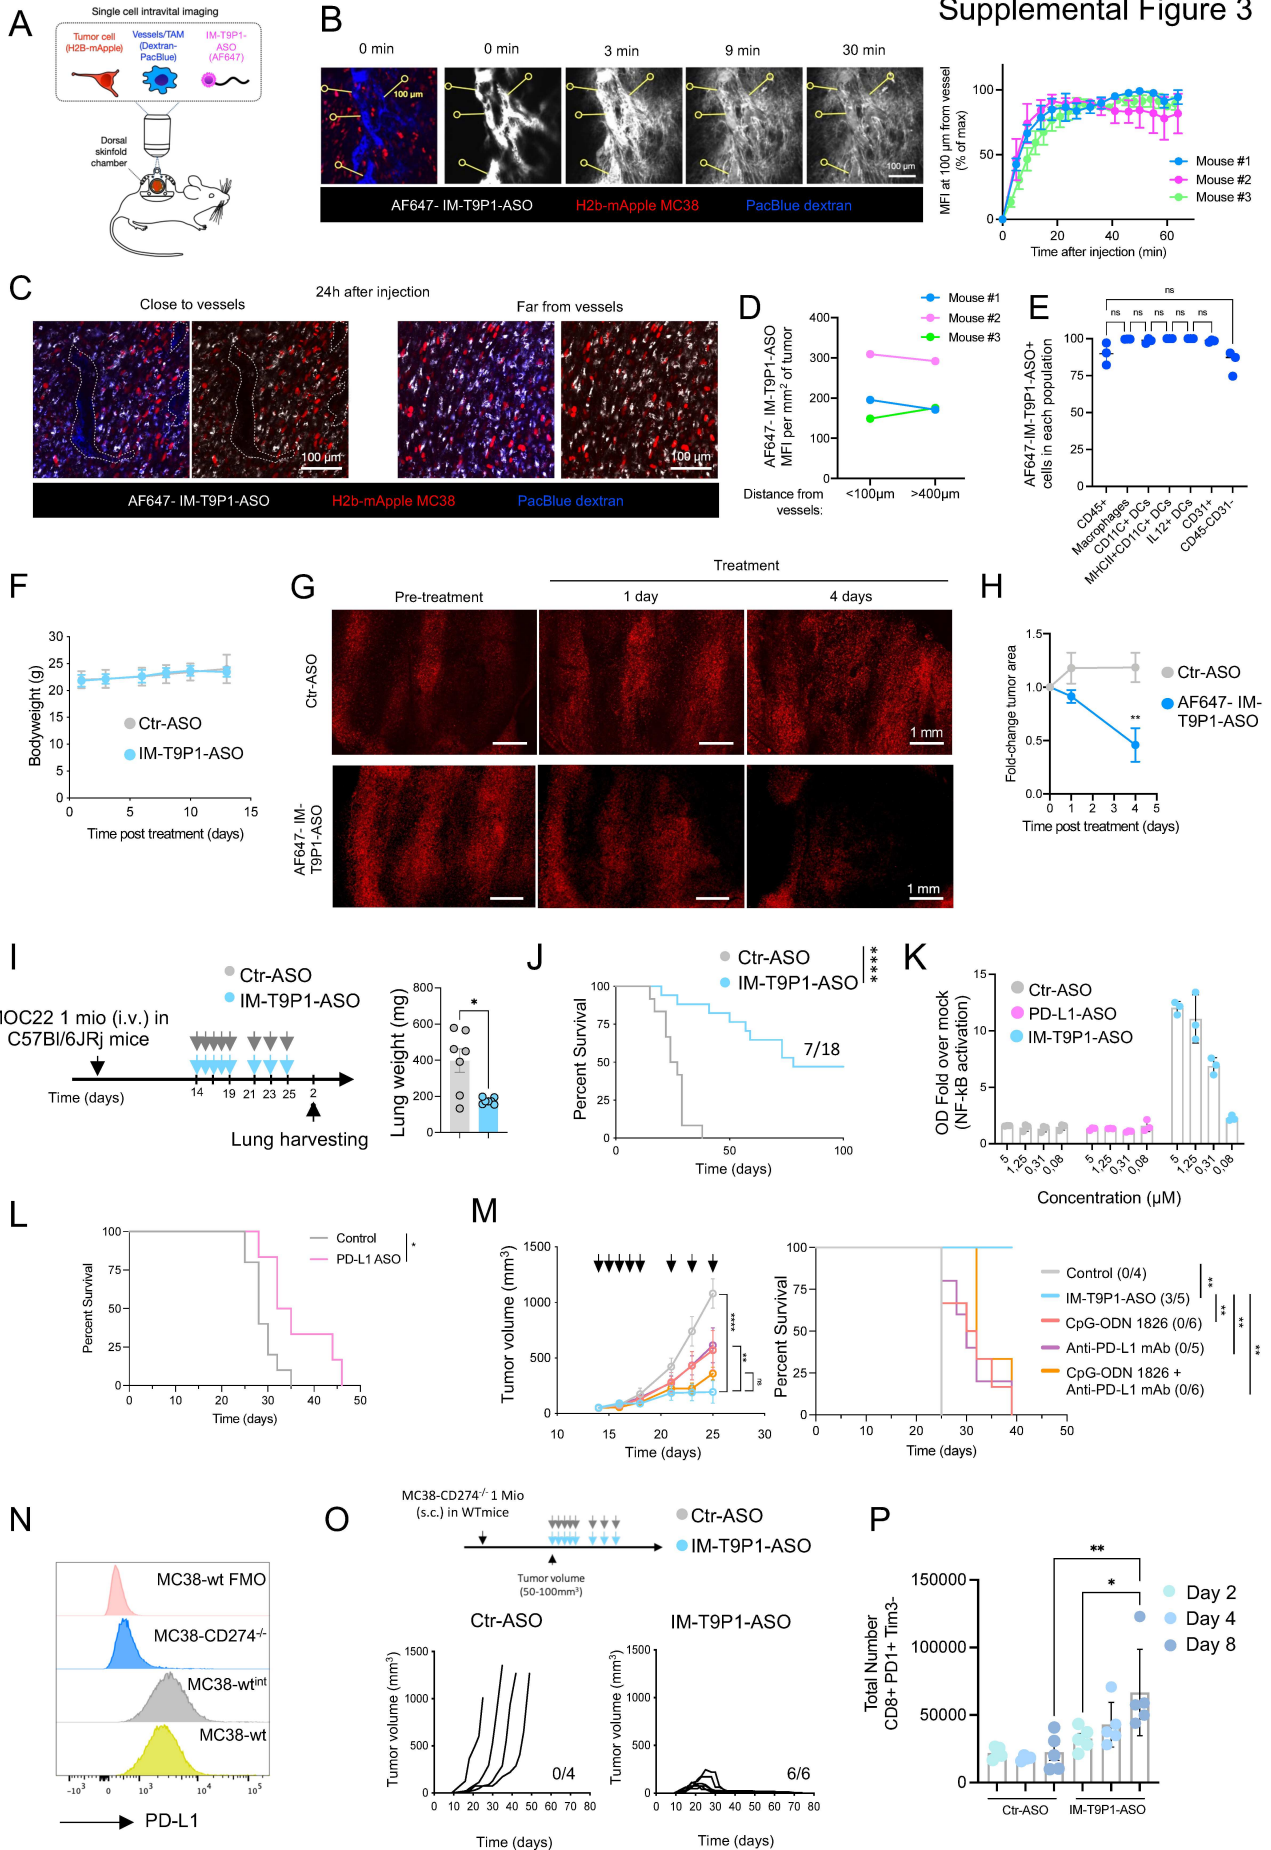

Supplement: jitc-2023-006714supp004.pdf [file jitc-2023-006714supp004.pdf]

## Supplemental Figure 4

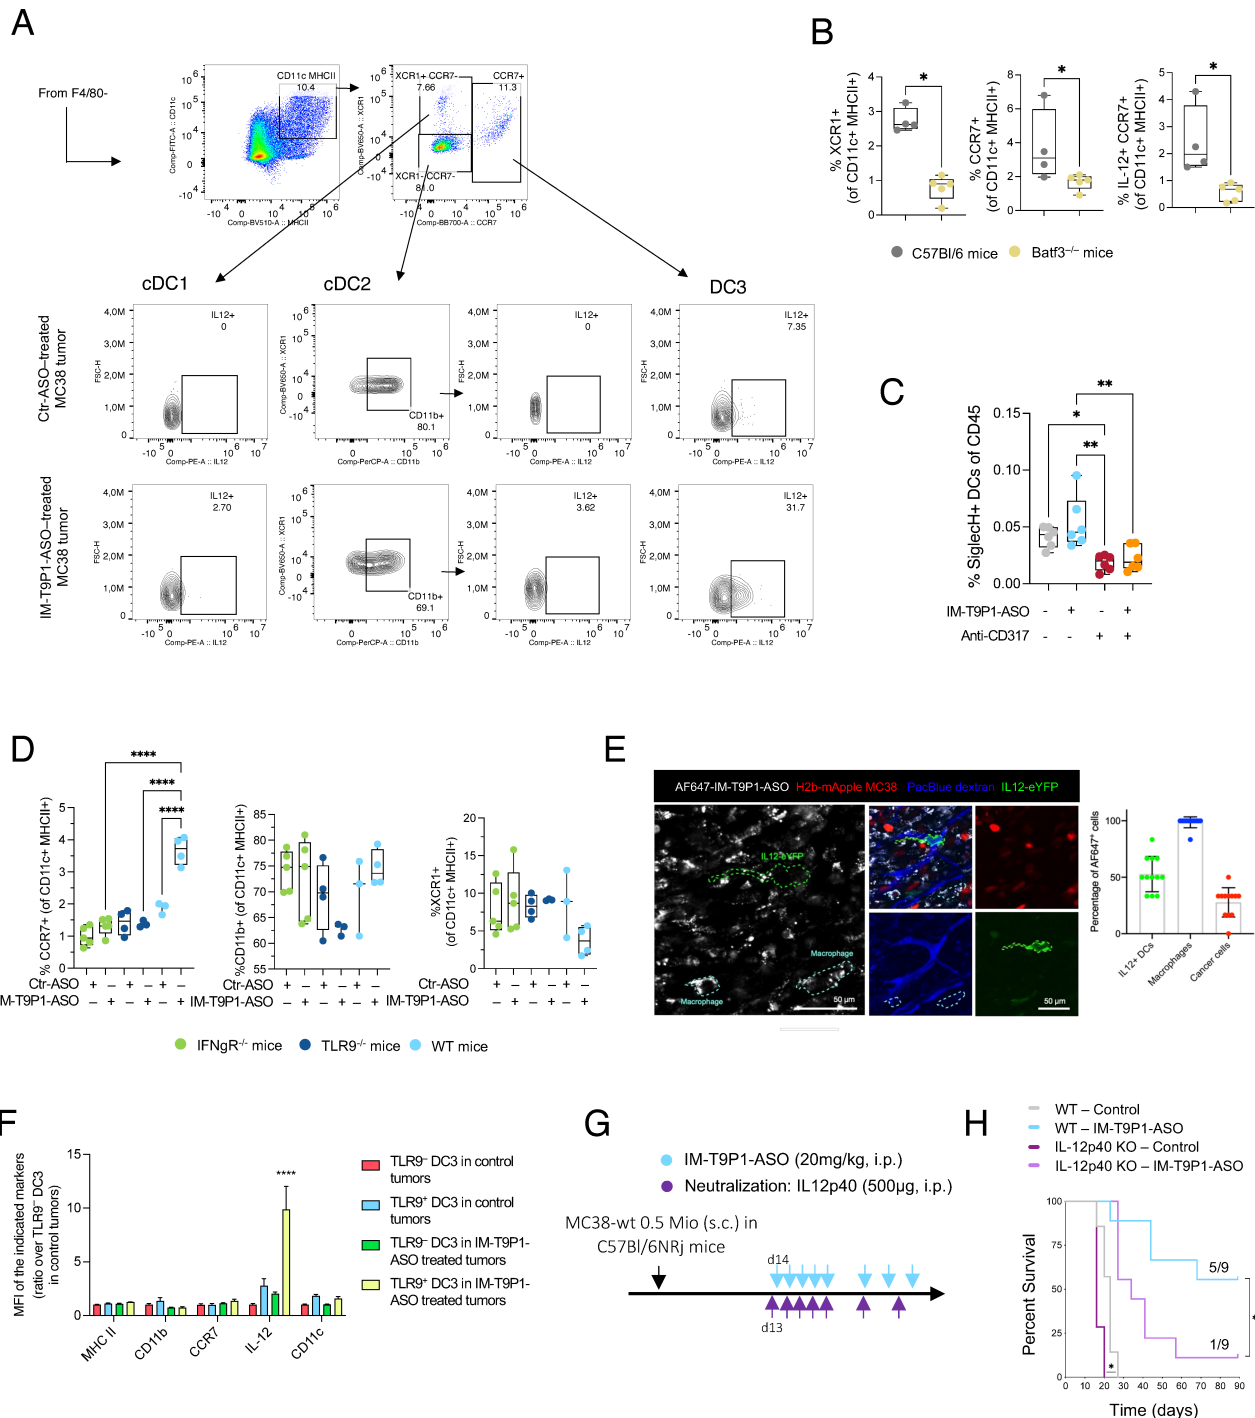

Supplement: jitc-2023-006714supp005.pdf [file jitc-2023-006714supp005.pdf]

## Supplemental Figure 5

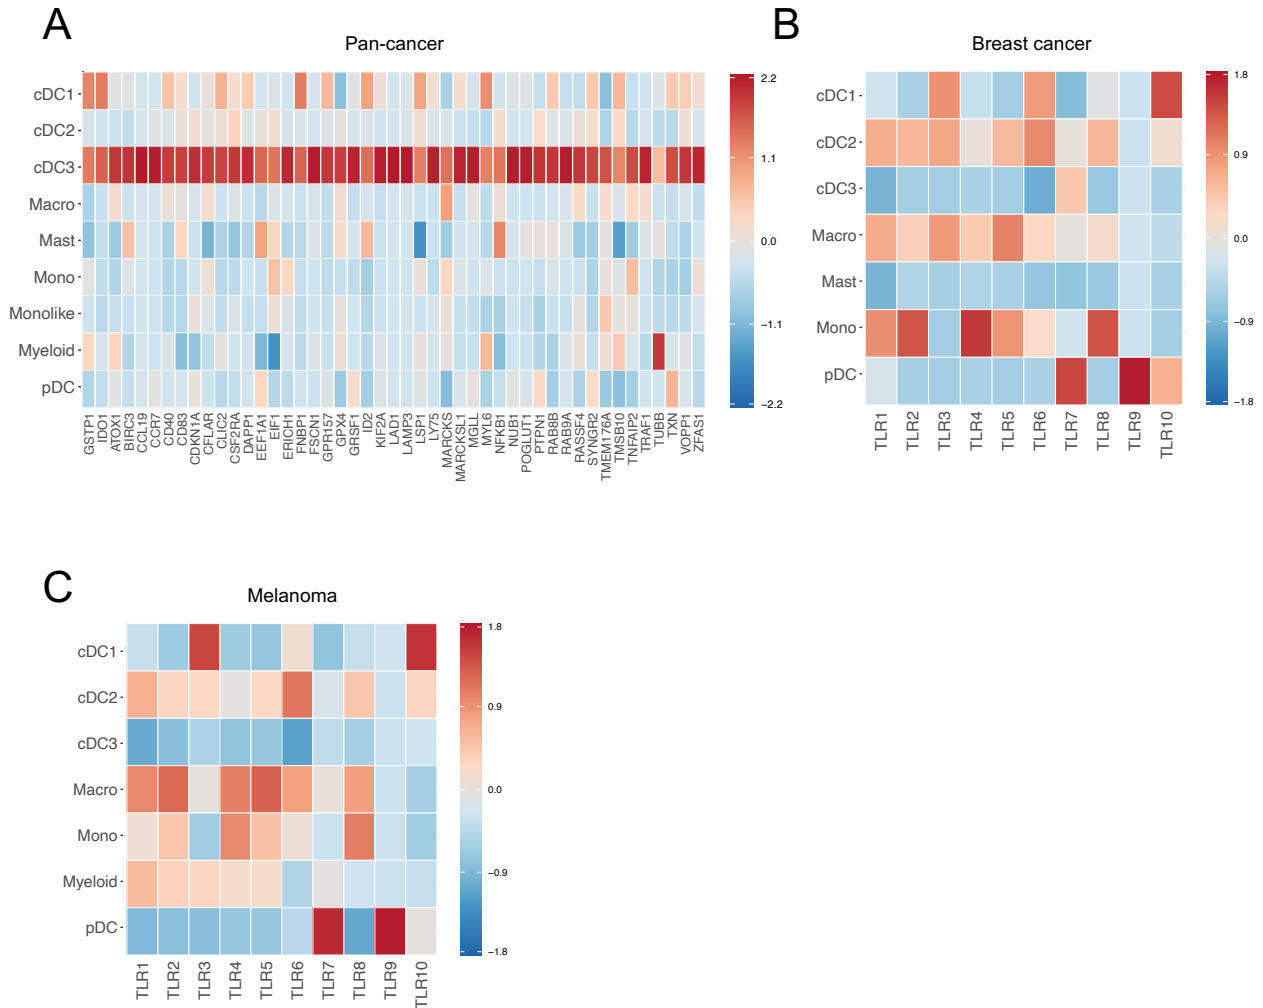

Supplement: jitc-2023-006714supp006.pdf [file jitc-2023-006714supp006.pdf]
