# Supplementary figures and images for: Dual TLR9 and PD-L1 targeting unleashes dendritic cells to induce durable antitumor immunity
Source: HighWire-hosted journal article supplement (doi:10.1136/jitc-2023-006714), 2023-05-01

## Supplemental Figure 1

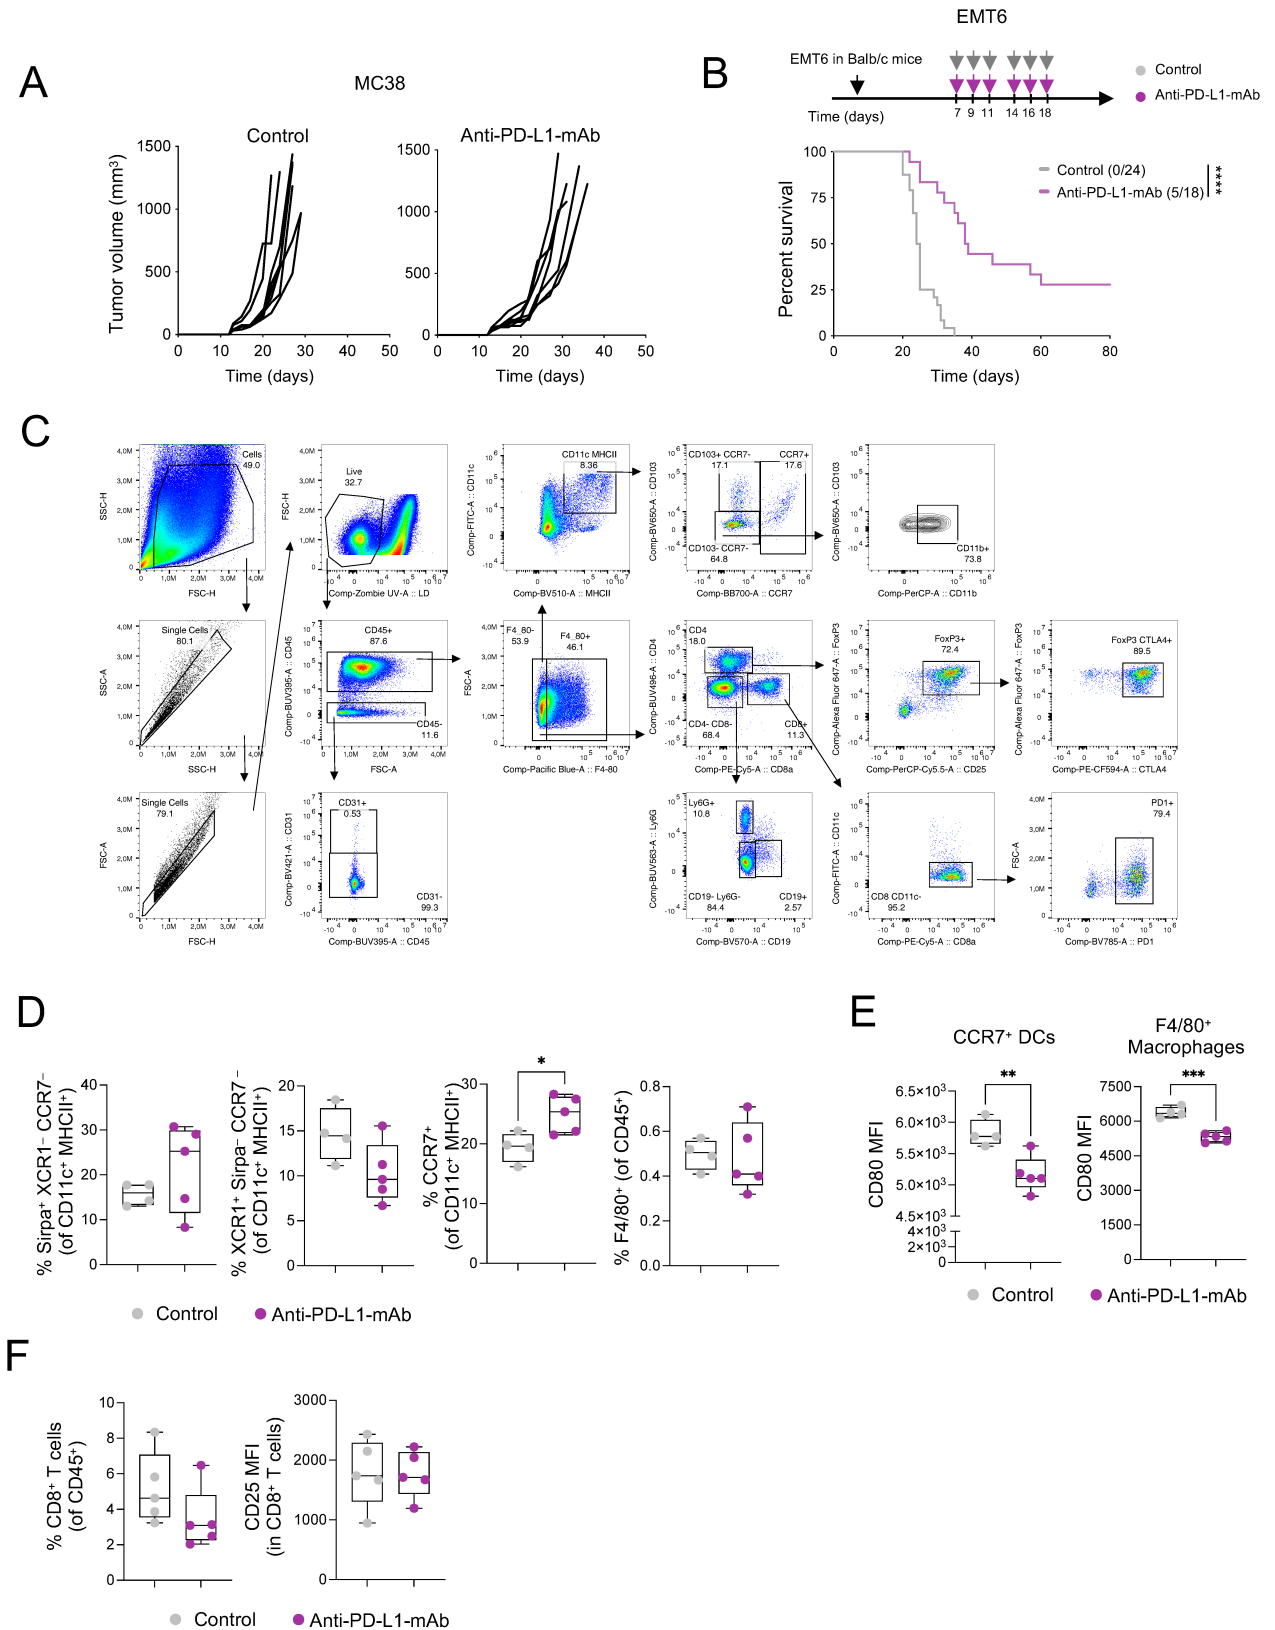

Supplement: jitc-2023-006714supp002_data_supplement.pdf [file jitc-2023-006714supp002_data_supplement.pdf]

Supplemental Figure 3

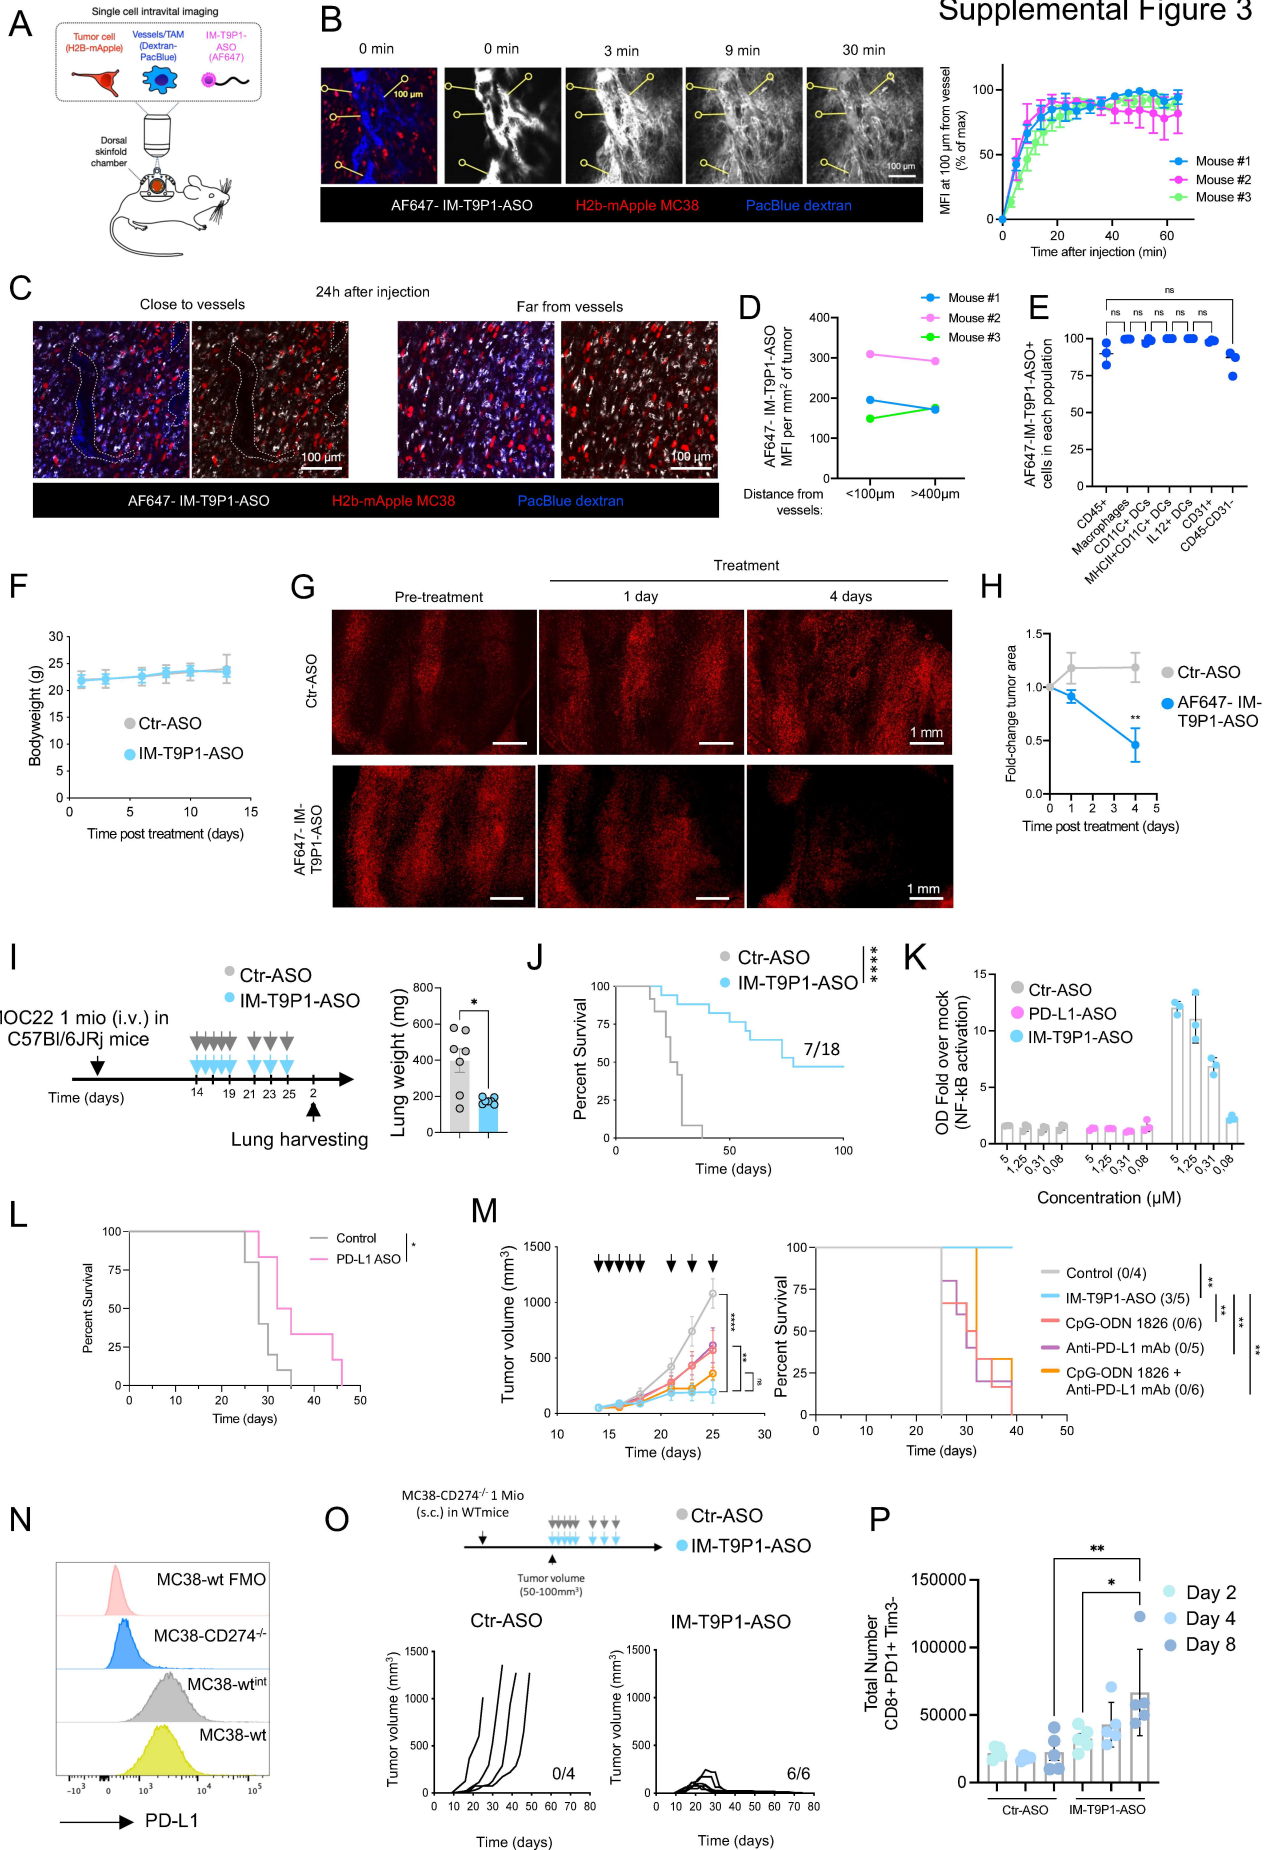

Supplement: jitc-2023-006714supp004_data_supplement.pdf [file jitc-2023-006714supp004_data_supplement.pdf]

## Supplemental Figure 4

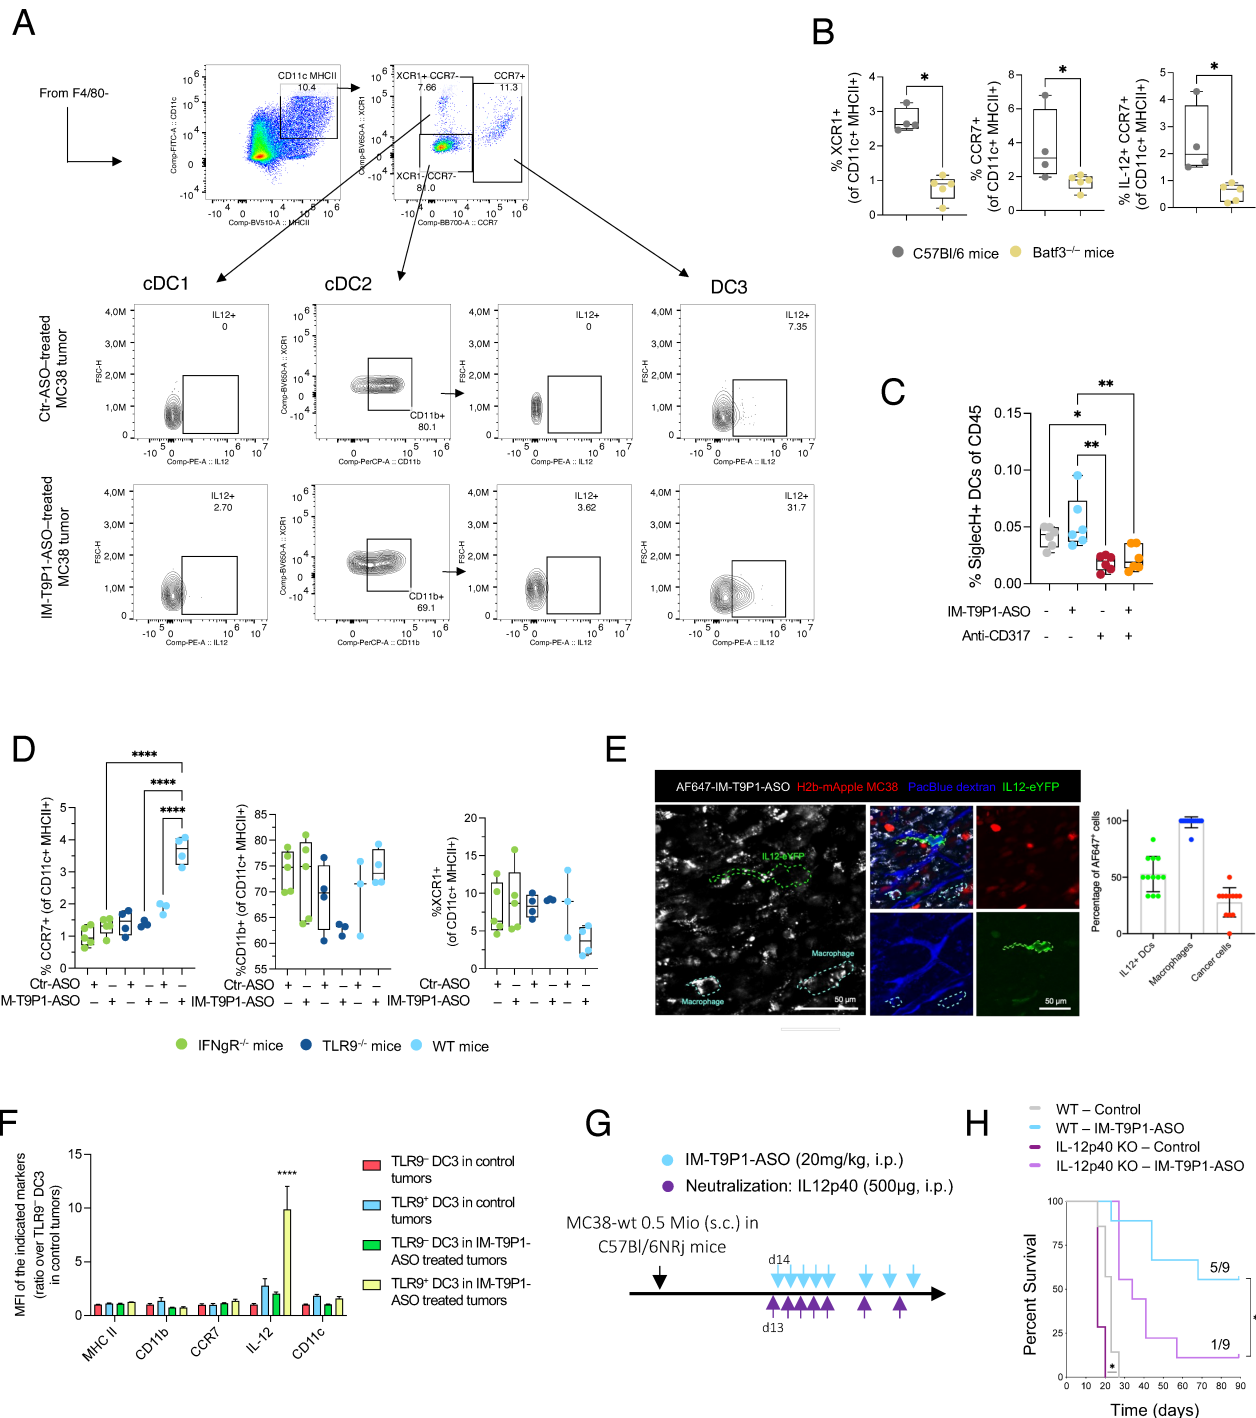

Supplement: jitc-2023-006714supp005_data_supplement.pdf [file jitc-2023-006714supp005_data_supplement.pdf]

## Supplemental Figure 5

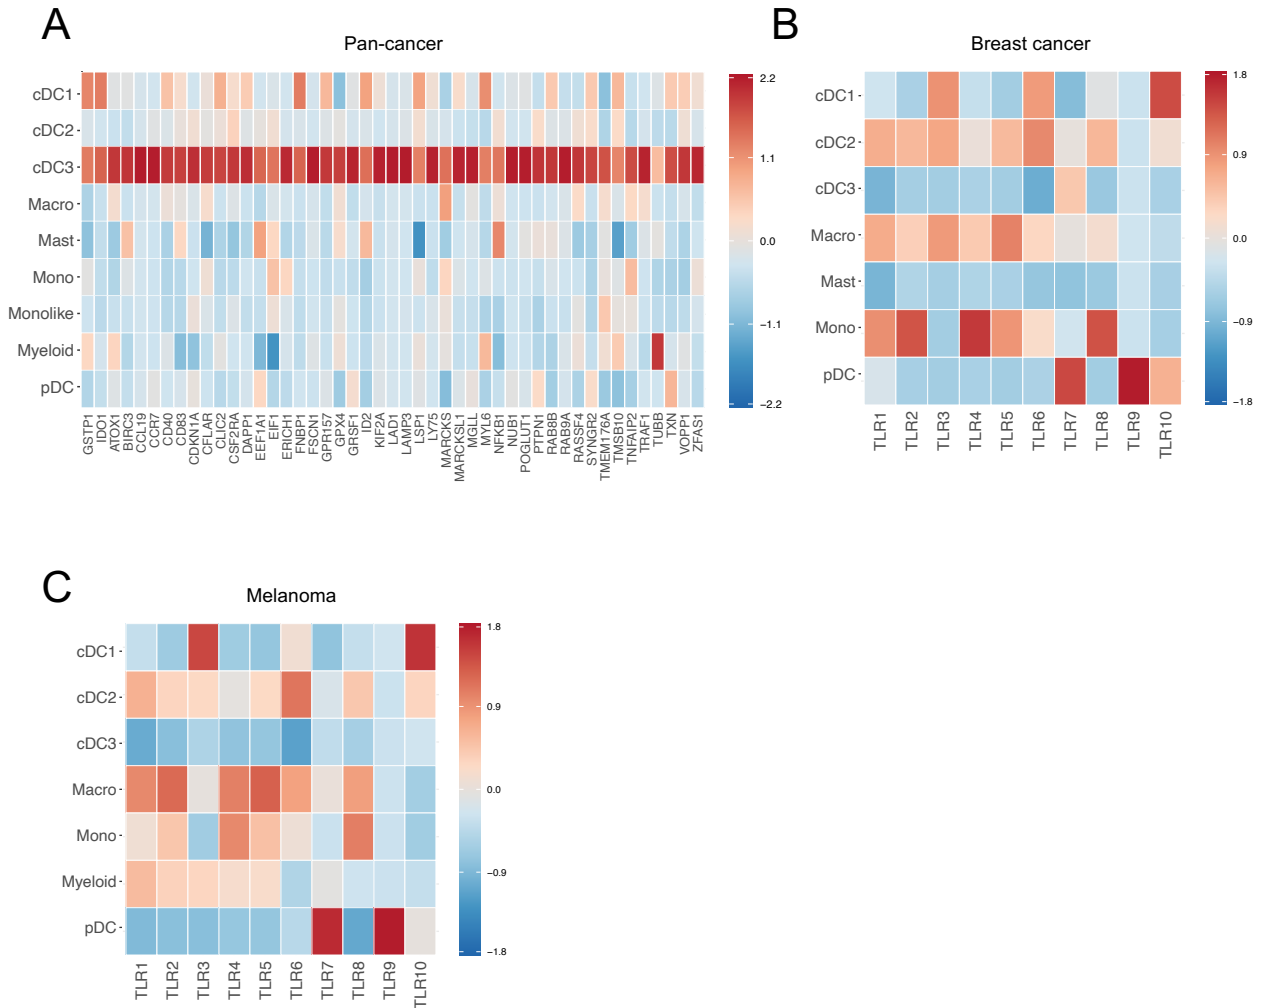

Supplement: jitc-2023-006714supp006_data_supplement.pdf [file jitc-2023-006714supp006_data_supplement.pdf]
